# Supplementary material for: Independent tuning of size and coverage of supported Pt nanoparticles using atomic layer deposition
Source: PubMed Central journal article supplement (PMC5651928; doi:10.1038/s41467-017-01140-z), 2017-10-20
Supplement: 41467_2017_1140_MOESM3_ESM.pdf [file 41467_2017_1140_MOESM3_ESM.pdf]

## Description of Additional Supplementary Files

File Name: Supplementary Movie 1

Description: Electron tomography characterization of the Pt nanoparticle shape: animated 3D volume rendering of Pt nanoparticles synthesized with the O<sub>2</sub>-based ALD process (Pt loading ~45 atoms nm<sup>-2</sup>).
